# Supplementary material
Source: PubMed Central journal article supplement (PMC8006535)
Supplement: NIHMS1679297-supplement-Supplementary_1.pdf [file NIHMS1679297-supplement-Supplementary_1.pdf]

**SDC1 Table. Summary of characteristics of the studies included in the systematic review**

| Country   | Years data collection | Study description                                                                      | Location | Sample size | Age group (years) | Main results and comments                                                                                                                                    | Reference |
|-----------|-----------------------|----------------------------------------------------------------------------------------|----------|-------------|-------------------|--------------------------------------------------------------------------------------------------------------------------------------------------------------|-----------|
| Mexico    | 1989 - 1991           | Retrospective analysis of collected stool samples from previous AGE cohort study       | C        | 115         | < 2               | Prevalence of NoV among AGE cases 8% (9/115)                                                                                                                 | A1        |
| Brazil    | 1994 - 2002           | Retrospective analysis of collected stool samples from hospitals                       | H        | 1006        | < 5               | Prevalence of HuCV among AGE cases 9% (87/1006)                                                                                                              | A2        |
| Peru      | 1995 - 1997           | Prospective hospital surveillance                                                      | H        | 233         | < 5               | Prevalence of NoV among AGE cases 35% (81/233)                                                                                                               | A3        |
| Brazil    | 1995 - 1999           | Retrospective analysis of collected stool samples from hospitals                       | H        | 94          | < 3               | Prevalence of NoV among AGE cases 36% (34/94)                                                                                                                | A4        |
| Argentina | 1997 - 1998           | Retrospective analysis of collected stool samples from previous AGE surveillance study | O        | 66          | < 3               | Prevalence of HuCV among AGE cases 24% (16/66)                                                                                                               | A5        |
| Chile     | 1997 - 1999           | Prospective outpatient and hospital surveillance                                       | O/ER/H   | 684         | < 6               | Prevalence of NoV among AGE cases (O) 7% (18/274)<br>Prevalence of NoV among AGE cases (ER) 10% (26/248)<br>Prevalence of NoV among AGE cases (H) 6% (9/162) | A6        |
| Mexico    | 1998 - 2000           | Prospective hospital surveillance                                                      | H        | 1129        | < 5               | Prevalence of NoV among AGE cases 2% (22/1129)<br>Only samples negative for other pathogens were tested for NoV                                              | A7        |
| Colombia  | 1999 - 2000           | Prospective ER surveillance                                                            | ER       | 300         | < 5               | Prevalence of HuCV among AGE cases                                                                                                                           | A8        |



|           |             |                                                  |        |      |      |                                                                                                                                                                                                                                                             |     |
|-----------|-------------|--------------------------------------------------|--------|------|------|-------------------------------------------------------------------------------------------------------------------------------------------------------------------------------------------------------------------------------------------------------------|-----|
| Chile     | 2006 - 2008 | Prospective outpatient and hospital surveillance | O/ER/H | 1913 | < 6  | Prevalence of NoV among AGE cases (O) 14% (49/359)<br>Prevalence of NoV among AGE cases (ER/H) 19% (287/1554)<br>Only 46% of the samples were tested by RT-PCR                                                                                              | A18 |
| Peru      | 2006 - 2008 | Prospective cohort study                         | C      | 587  | < 2  | Prevalence of NoV among AGE cases 7% (39/587)<br>Only samples negative for other pathogens were tested for NoV                                                                                                                                              | A19 |
| Chile     | 2007 - 2008 | Prospective hospital surveillance                | H      | 92   | < 15 | Prevalence of NoV among AGE cases 22% (20/92)<br>Prevalence of NoV among asymptomatic cases 4% (2/57)                                                                                                                                                       | A20 |
| Brazil    | 2007 - 2009 | Prospective community surveillance               | C      | 131  | < 11 | Prevalence of NoV among AGE cases 9% (12/131)<br>Prevalence of NoV among asymptomatic cases 2% (4/266)<br>Data collection carried out after RV vaccine introduction - VC of study population not specified<br>Study carried out in the Quilombola community | A21 |
| Guatemala | 2007 - 2010 | Prospective outpatient and hospital surveillance | O/H    | 2403 | All  | Prevalence of NoV among AGE cases (O) 12% (227/1875)<br>Prevalence of NoV among AGE cases (H) 22% (114/528)                                                                                                                                                 | A22 |

|           |             |                                                  |        |      |      |                                                                                                                                                                                                                                                                                              |     |
|-----------|-------------|--------------------------------------------------|--------|------|------|----------------------------------------------------------------------------------------------------------------------------------------------------------------------------------------------------------------------------------------------------------------------------------------------|-----|
| Peru      | 2007 - 2011 | Prospective cohort study                         | C      | 1495 | < 2  | <p>Incidence of NoV disease 29 - 84 per 100PY</p> <p>Prevalence of NoV among AGE cases 23% (341/1495)</p> <p>Prevalence of NoV among asymptomatic cases 13% (491/3690)</p> <p>Data collection partially carried out after RV vaccine introduction - VC of study population not specified</p> | A23 |
| Brazil    | 2008 - 2010 | Prospective community surveillance               | C      | 81   | < 10 | <p>Prevalence of NoV among AGE cases 20% (16/81)</p> <p>Prevalence of NoV among asymptomatic cases 0% (0/78)</p> <p>Data collection carried out after RV vaccine introduction - VC of study population not specified</p> <p>Study carried out in the Quilombola community</p>                | A24 |
| Nicaragua | 2009 - 2010 | Prospective outpatient and hospital surveillance | O/ER/H | 330  | < 6  | <p>Prevalence of NoV among AGE cases (O) 21% (32/155)</p> <p>Prevalence of NoV among AGE cases (ER/H) 27% (47/175)</p> <p>Data collection carried out after RV vaccine introduction - 95% of the study population received at least 1 dose of RV vaccine</p>                                 | A25 |

|           |             |                                                                  |   |     |               |                                                                                                                                                                                                                                                                                      |     |
|-----------|-------------|------------------------------------------------------------------|---|-----|---------------|--------------------------------------------------------------------------------------------------------------------------------------------------------------------------------------------------------------------------------------------------------------------------------------|-----|
| Ecuador   | 2009 - 2012 | Prospective cohort study                                         | C | 438 | < 3           | Incidence of NoV disease 17 per 100PY<br>Prevalence of NoV among AGE cases 18% (79/438)<br>Prevalence of NoV among asymptomatic cases 18% (181/1016)<br>Data collection carried out after RV vaccine introduction - VC of study population not specified                             | A26 |
| Nicaragua | 2010 - 2011 | Prospective community surveillance                               | C | 333 | < 5           | Incidence of NoV disease 23 per 100PY<br>Prevalence of NoV among AGE cases 20% (68/333)<br>Prevalence of NoV among asymptomatic cases 13% (14/106)<br>Data collection carried out after RV vaccine introduction - 82% of the study population received at least 1 dose of RV vaccine | A27 |
| Brazil    | 2010 - 2011 | Retrospective analysis of collected stool samples from hospitals | H | 225 | NS - children | Prevalence of NoV among AGE cases 8% (19/225)<br>Data collection carried out after RV vaccine introduction - VC of study population not specified                                                                                                                                    | A28 |
| Cuba      | 2010 - 2011 | Prospective hospital surveillance                                | H | 88  | < 5           | Prevalence of NoV among AGE cases 32% (28/88)                                                                                                                                                                                                                                        | A29 |
| Brazil    | 2010 - 2012 | Prospective hospital surveillance                                | H | 591 | < 6           | Prevalence of NoV among AGE cases 8% (46/591)<br>12/46 NoV infections were nosocomial AGE<br>Data collection carried out after RV vaccine introduction - VC of study                                                                                                                 | A30 |

|           |             |                                                          |  |   |      |      |                                                                                            |     |
|-----------|-------------|----------------------------------------------------------|--|---|------|------|--------------------------------------------------------------------------------------------|-----|
|           |             |                                                          |  |   |      |      | population not specified                                                                   |     |
| Brazil    | 1970 - 1978 | Seroprevalence survey                                    |  | C | 460  | All  | Seroprevalence of GI.1 Ab 77%<br>(354/460)<br>Study conducted among 8 Amazon Indian tribes | A31 |
| Brazil    | 1989 - 1993 | Seroprevalence survey in a cohort study                  |  | C | 135  | < 5  | Seroprevalence of GI.1 Ab 71% (96/135)                                                     | A32 |
| Chile     | 1990 - 1991 | Seroprevalence survey                                    |  | C | 1864 | < 46 | Seroprevalence of GI.1 Ab 2% (30/1864)<br>Seroprevalence of GII.3 Ab 16% (305/1864)        | A33 |
| Mexico    | 1993 - 1995 | Seroprevalence survey                                    |  | C | 495  | All  | Seroprevalence of GII.3 Ab 57% (280/495)                                                   | A34 |
| Guatemala | 1999        | Seroprevalence survey                                    |  | C | 544  | < 3  | Seroprevalence of GI.1 Ab 72% (388/544)                                                    | A35 |
| Guatemala | 2001 - 2002 | Seroprevalence survey in the context of a clinical trial |  | C | 52   | < 2  | Seroprevalence of NoV Ab 58% (30/52)<br>NoV genotype tested for not specified              | A36 |
| Chile     | 2000 - 2003 | Outbreak surveillance                                    |  | C | 55   | All  | Prevalence of NoV among AGE outbreaks 45% (25/55)                                          | A37 |
| Brazil    | 2009        | Outbreak surveillance                                    |  | C | 391  | All  | Prevalence of NoV among AGE outbreaks 4% (15/391)                                          | A38 |

NoV: Noroviruses; HuCV: Human caliciviruses; RV: Rotavirus; C: Community; ER: Emergency room; H: Hospital; Ab: Antibodies; VC: vaccination coverage.

## References

- A1. Farkas T, Jiang X, Guerrero ML, et al. Prevalence and genetic diversity of human caliciviruses (HuCVs) in Mexican children. *J Med Virol.* 2000; 62:217-223.
- A2. Borges AM, Teixeira JM, Costa PS, et al. Detection of calicivirus from fecal samples from children with acute gastroenteritis in the West Central region of Brazil. *Mem Inst Oswaldo Cruz.* 2006; 101:721-724.
- A3. Parashar UD, Li JF, Cama R, et al. Human caliciviruses as a cause of severe gastroenteritis in Peruvian children. *J Infect Dis.* 2004; 190:1088-1092.
- A4. Castilho JG, Munford V, Resque HR, Fagundes-Neto U, Vinje J, Racz ML. Genetic diversity of norovirus among children with gastroenteritis in Sao Paulo State, Brazil. *J Clin Microbiol.* 2006; 44:3947-3953.
- A5. Bereciartu A, Bok K, Gomez J. Identification of viral agents causing gastroenteritis among children in Buenos Aires, Argentina. *J Clin Virol.* 2002; 25:197-203.
- A6. O'Ryan ML, Mamani N, Gaggero A, et al. Human caliciviruses are a significant pathogen of acute sporadic diarrhea in children of Santiago, Chile. *J Infect Dis.* 2000; 182:1519-1522.
- A7. Gutierrez-Escolano AL, Velazquez FR, Escobar-Herrera J, Lopez Saucedo C, Torres J, Estrada-Garcia T. Human caliciviruses detected in Mexican children admitted to hospital during 1998-2000, with severe acute gastroenteritis not due to other enteropathogens. *J Med Virol.* 2010; 82:632-637.
- A8. Gutierrez MF, Matiz A, Trespalacios AA, Parra M, Riano M, Mercado M. Virus diversity of acute diarrhea in tropical highlands. *Rev Latinoam Microbiol.* 2006; 48:17-23.
- A9. Andreasi MS, Cardoso D, Fernandes SM, et al. Adenovirus, calicivirus and astrovirus detection in fecal samples of hospitalized children with acute gastroenteritis from Campo Grande, MS, Brazil. *Mem Inst Oswaldo Cruz.* 2008; 103:741-744.
- A10. Gonzalez GG, Liprandi F, Ludert JE. Molecular epidemiology of enteric viruses in children with sporadic gastroenteritis in Valencia, Venezuela. *J Med Virol.* 2011; 83:1972-1982.
- A11. Barreira DM, Ferreira MS, Fumian TM, et al. Viral load and genotypes of noroviruses in symptomatic and asymptomatic children in Southeastern Brazil. *J Clin Virol.* 2010; 47:60-64.
- A12. Yori PP, Schwab K, Gilman RH, et al. Norovirus highly prevalent cause of endemic acute diarrhea in children in the peruvian Amazon. *Pediatr Infect Dis J.* 2009; 28:844-847.
- A13. Victoria M, Carvalho-Costa FA, Heinemann MB, Leite JP, Miagostovich M. Prevalence and molecular epidemiology of noroviruses in hospitalized children with acute gastroenteritis in Rio de Janeiro, Brazil, 2004. *Pediatr Infect Dis J.* 2007; 26:602-606.
- A14. Ribeiro LR, Giuberti RS, Barreira DM, et al. Hospitalization due to norovirus and genotypes of rotavirus in pediatric patients, state of Espirito Santo. *Mem Inst Oswaldo Cruz.* 2008; 103:201-206.
- A15. Bucardo F, Nordgren J, Carlsson B, et al. Pediatric norovirus diarrhea in Nicaragua. *J Clin Microbiol.* 2008; 46:2573-2580.
- A16. Bucardo F, Nordgren J, Carlsson B, et al. Asymptomatic norovirus infections in Nicaraguan children and its association with viral properties and histo-blood group antigens. *Pediatr Infect Dis J.* 2010; 29:934-939.
- A17. O'Ryan ML, Lucero Y, Prado V, et al. Symptomatic and asymptomatic rotavirus and norovirus infections during infancy in a Chilean birth cohort. *Pediatr Infect Dis J.* 2009; 28:879-884.
- A18. O'Ryan ML, Pena A, Vergara R, et al. Prospective characterization of norovirus compared with rotavirus acute diarrhea episodes in Chilean children. *Pediatr Infect Dis J.* 2010; 29:855-859.

- A19. Rivera FP, Ochoa TJ, Ruiz J, et al. Norovirus prevalence in 'pathogen negative' gastroenteritis in children from periurban areas in Lima, Peru. *Trans R Soc Trop Med Hyg.* 2011; 105:734-736.
- A20. Montenegro S, Pineda S, Enriquez I, Enriquez N, Rivera N, Delgado C. [Norovirus detection in children with community-acquired or nosocomial diarrhea at Guillermo Grant Benavente Hospital in Concepcion, Chile]. *Rev Chilena Infectol.* 2014; 31:298-304.
- A21. Vicentini F, Denadai W, Gomes YM, et al. Molecular characterization of noroviruses and HBGA from infected Quilombola children in Espirito Santo State, Brazil. *PLoS One.* 2013;8: e69348.
- A22. Estevez A, Arvelo W, Hall AJ, et al. Prevalence and genetic diversity of norovirus among patients with acute diarrhea in Guatemala. *J Med Virol.* 2013; 85:1293-1298.
- A23. Saito M, Goel-Apaza S, Espetia S, et al. Multiple norovirus infections in a birth cohort in a Peruvian Periurban community. *Clin Infect Dis.* 2014; 58:483-491.
- A24. Aragao GC, Mascarenhas JD, Kaiano JH, et al. Norovirus diversity in diarrheic children from an African-descendant settlement in Belem, Northern Brazil. *PLoS One.* 2013;8: e56608.
- A25. Bucardo F, Reyes Y, Svensson L, Nordgren J. Predominance of norovirus and sapovirus in Nicaragua after implementation of universal rotavirus vaccination. *PLoS One.* 2014;9: e98201.
- A26. Lopman BA, Trivedi T, Vicuna Y, et al. Norovirus Infection and Disease in an Ecuadorian Birth Cohort: Association of Certain Norovirus Genotypes With Host FUT2 Secretor Status. *J Infect Dis.* 2014.
- A27. Becker-Dreps S, Bucardo F, Vilchez S, et al. Etiology of childhood diarrhea after rotavirus vaccine introduction: a prospective, population-based study in Nicaragua. *Pediatr Infect Dis J.* 2014; 33:1156-1163.
- A28. Raboni SM, Damasio GA, Ferreira CE, et al. Acute gastroenteritis and enteric viruses in hospitalised children in southern Brazil: aetiology, seasonality and clinical outcomes. *Mem Inst Oswaldo Cruz.* 2014; 109:428-435.
- A29. Ribas Mde L, Castano Y, Martinez MD, Tejero Y, Cordero Y. Norovirus and Rotavirus infection in children aged less than five years in a paediatric hospital, Havana, Cuba. *Braz J Infect Dis.* 2015; 19:222-223.
- A30. Amaral MS, Estevam GK, Penatti M, et al. The prevalence of norovirus, astrovirus and adenovirus infections among hospitalised children with acute gastroenteritis in Porto Velho, state of Rondonia, western Brazilian Amazon. *Mem Inst Oswaldo Cruz.* 2015; 0:0.
- A31. Gabbay YB, Glass RI, Monroe SS, et al. Prevalence of antibodies to Norwalk virus among Amerindians in isolated Amazonian communities. *Am J Epidemiol.* 1994; 139:728-733.
- A32. Talal AH, Moe CL, Lima AA, et al. Seroprevalence and seroincidence of Norwalk-like virus infection among Brazilian infants and children. *J Med Virol.* 2000; 61:117-124.
- A33. O'Ryan ML, Vial PA, Mamani N, et al. Seroprevalence of Norwalk virus and Mexico virus in Chilean individuals: assessment of independent risk factors for antibody acquisition. *Clin Infect Dis.* 1998; 27:789-795.
- A34. Peasey AE, Ruiz-Palacios GM, Quigley M, et al. Seroepidemiology and risk factors for sporadic norovirus/Mexico strain. *J Infect Dis.* 2004; 189:2027-2036.
- A35. Steinberg EB, Mendoza CE, Glass R, et al. Prevalence of infection with waterborne pathogens: a seroepidemiologic study in children 6-36 months old in San Juan Sacatepequez, Guatemala. *Am J Trop Med Hyg.* 2004; 70:83-88.
- A36. Crump JA, Mendoza CE, Priest JW, et al. Comparing serologic response against enteric pathogens with reported diarrhea to assess the impact of improved household drinking water quality. *Am J Trop Med Hyg.* 2007; 77:136-141.
- A37. Vidal R, Solari V, Mamani N, et al. Caliciviruses and foodborne gastroenteritis, Chile. *Emerg Infect Dis.* 2005; 11:1134-1137.



A38. Eduardo MBdP, Suzuki E, Katsuya E, et al. Vigilância epidemiológica: Informe Net-DTA: manual das doenças transmitidas por alimentos norovirus/norovisoses. 2010: Available: <http://ses.sp.bvs.br/lildbi/docsonline/get.php?id=2673>.
